# Supplementary material
Source: PubMed Central journal article supplement (PMC8085165)
Supplement: NIHMS1684108-supplement-Supplemental_Publication_Material.pdf [file NIHMS1684108-supplement-Supplemental_Publication_Material.pdf]

## **SUPPLEMENTAL MATERIAL**

### **Divergent functions of tissue-resident and blood-derived macrophages in the hemorrhagic brain**

Che-Feng Chang, PhD; Brittany A. Goods, PhD; Michael H. Askenase, PhD; Hannah E. Beatty, BS; Artem Osherov, BS; Jonathan DeLong, PhD; Matthew D. Hammond, PhD; Jordan Massey, BS; Margaret Landreneau, BA; J. Christopher Love, PhD; Lauren H. Sansing, MD, MS

Graduate Institute of Physiology (C.-F.C.), College of Medicine, National Taiwan University, Taipei, Taiwan; Department of Biological Engineering, Koch Institute for Integrative Cancer Research (B.A.G, J.C.L.) at Massachusetts Institute of Technology, Cambridge; Department of Neurology (C.-F.C., H.E.B., M.H.A., A.O. M.L., J.M., J.D., M.D.H., L.H.S.), Yale University School of Medicine, New Haven.

## Table of Contents

|                                                                            |           |
|----------------------------------------------------------------------------|-----------|
| <b>SUPPLEMENTAL METHODS.....</b>                                           | <b>3</b>  |
| <b>1. ICH Model.....</b>                                                   | <b>3</b>  |
| <b>2. In Vivo Phagocytosis Assays.....</b>                                 | <b>3</b>  |
| <b>3. Cell Sorting for Transcriptional Analyses.....</b>                   | <b>4</b>  |
| <b>4. Bioinformatics analysis.....</b>                                     | <b>5</b>  |
| <b>5. Bone Marrow-Derived Macrophages (BMDMs) .....</b>                    | <b>5</b>  |
| <b>6. Primary Microglia Culture.....</b>                                   | <b>6</b>  |
| <b>7. Real-Time Quantitative Reverse-Transcriptase PCR (RT-qPCR) .....</b> | <b>7</b>  |
| <b>8. Naïve T cell Isolation.....</b>                                      | <b>7</b>  |
| <b>9. T cell-BMDM and T cell-Primary Microglia Co-cultures.....</b>        | <b>8</b>  |
| <b>SUPPLEMENTAL FIGURES.....</b>                                           | <b>10</b> |
| <b>SUPPLEMENTAL TABLES.....</b>                                            | <b>19</b> |

## **SUPPLEMENTAL METHODS**

### **ICH Model**

The autologous blood ICH model in male mice was utilized according to our established protocol.<sup>16</sup> In brief, mice were anesthetized throughout the procedure with 1-3% isoflurane in oxygen-enriched air (20%:80%) via nose cone. After sterile midline scalp incision, a burrhole was made in the right side of the skull at 0.0 mm anterior and 2.5 mm lateral to bregma. A total of 25- $\mu$ L autologous blood was injected to a depth of 3.0 mm below the surface of the dura at a 5-degree angle. The craniotomy was sealed with bone wax, and the scalp was closed with tissue adhesive (3M Vetbond). Rectal temperature was monitored and body temperature maintained at  $37.0 \pm 0.5^\circ\text{C}$  by an electronic thermostat-controlled warming blanket (FHC Inc.) throughout the experimental and recovery periods. No mice were excluded. Transcriptional data was available from male mice only and therefore all experiments were performed in males.

### **In Vivo Phagocytosis Assays**

#### *Microsphere-based assay*

During the autologous blood injection ICH surgery,  $4.5 \times 10^7$  1- $\mu\text{m}$  diameter Fluoresbrite YG carboxylate beads (Polysciences) were mixed with the collected blood prior to injection as above. Animals were euthanized at days 1, 3, and 7 post-ICH by isoflurane overdose and then perfused transcardially with ice-cold PBS prior to brain harvest. 4-mm fresh coronal perihematomal tissue sections were collected based on our established standard procedure.<sup>16</sup> The brain tissues were mechanically and enzymatically digested. Leukocyte-enriched fraction was isolated by 30%/70% Percoll (GE Health) gradient centrifugation and stained with cell surface markers [CD45 (30-F11),

Ly6C (HK1.4), CD11b (M1/70), Ly6G (1A8), CD3e (500A2)]. After fixation in 4% paraformaldehyde and staining with DAPI, the cells were evaluated on an ImageStreamX Mark II (Amnis). The beads containing cells were selected and the number of fluorescent beads in each cell was calculated. The data are presented as beads per cell.

### *Erythrophagocytosis assay*

Erythrocytes were isolated and labeled with the lipophilic cell membrane fluorescent dye PKH-26 (PKH26GL, Sigma) as previously described<sup>1</sup> and injected into the mice brain during autologous blood ICH surgery. Mice were sacrificed at 3 days after PKH-26-labeled erythrocyte injection and the brain samples were prepared as described above. The cells were stained for surface markers CD11b (M1/70), CD45 (30-F11), Ly6G (1A8), Ly6C (HK1.4) and viability dye (Invitrogen). The erythrophagocytosis-positive microglia and MDMs were identified as LIVE/DEAD<sup>-</sup>CD11b<sup>+</sup>CD45<sup>int</sup>PKH-26-erythrocyte<sup>+</sup> and LIVE/DEAD<sup>-</sup>CD11b<sup>+</sup>CD45<sup>hi</sup>Ly6G<sup>-</sup>Ly6C<sup>+</sup>PKH-26-erythrocyte<sup>+</sup> populations, respectively. The results are presented as the percentage of erythrocyte-positive cells and the mean fluorescence intensity (MFI) of PKH-erythrocyte-positive cells. The experimental gate was set based on the fluorescence-minus-one (FMO) control. Control samples were taken from the naïve brain matching the 4-mm coronal perihematomal region.

### **Transcriptional Analyses**

Previously published longitudinal transcriptional datasets from nanoString analysis (PanCancer Immune Profiling Panel plus 27 custom genes; total 780 genes) were used for microglia and macrophage comparative analysis.<sup>16, 17</sup> Naïve and post-ICH mice at days 1, 3, 7, 10 after surgery were euthanized and perihematomal brain or the corresponding area from naïve mice were

collected. For each replicate, brain samples from three mice were pooled. The brain samples were prepared and stained as described above. After surface and live/dead staining, the microglia (CD11b<sup>+</sup>CD45<sup>int</sup>) and MDMs (CD11b<sup>+</sup>CD45<sup>hi</sup>Ly6G<sup>-</sup>CD3e<sup>-</sup>Ly6C<sup>+</sup>) were sorted on a FACSAria directly into 4  $\mu$ l RLT buffer (QIAGEN) and stored at -80°C until analysis.

Nanostring data were first preprocessed according to the manufacturer's instructions and then further analyzed using custom R (V 3.3.3) scripts as previously described.<sup>16, 17</sup> Briefly, nCounter data were normalized to housekeeping genes and genes with expressed absolute count below 7 (the threshold of detection instructed by the manufacture) at all time points were eliminated. Principal components analysis (PCA) was performed on log transformed data to identify genes driving separation between microglia and macrophages. To identify genes that were significantly different, we compared macrophages to microglia pairwise at each time point. We used Student's t-test and p values were adjusted using the Bonferroni correction to adjust for multiple comparisons. Volcano plots and heat maps were created for each indicated comparison. Enrichment analysis was performed using the Cytoscape (v 3.6.1) plugin GeneMania (v 3.4.1). Gene set enrichment analysis (GSEA) was also performed for each time point.<sup>19</sup> R scripts for the analyses are available at [https://github.com/bagoods/Chang\\_Goods\\_MacrophagevMicroglia](https://github.com/bagoods/Chang_Goods_MacrophagevMicroglia).

### **Bone Marrow-Derived Macrophages (BMDMs)**

Mononuclear cells collected from 6- to 8-week-old C57BL/6 male mice were isolated and differentiated into BMDMs as described previously.<sup>16</sup> In short, adherent stromal cells were depleted by culturing the harvested bone marrow at 37°C overnight in complete  $\alpha$ -minimum essential medium:  $\alpha$ -MEM (Lonza) supplemented with 10% HI-FBS, 100 U/mL penicillin plus

100 mg/mL streptomycin, and 2 mM L-glutamine (all from Gibco). After RBCs were lysed, remaining non-adherent mononuclear cells were cultured in the complete  $\alpha$ -MEM plus 50 ng/mL of recombinant murine M-CSF (R&D Systems) for 7 days, yielding BMDMs.

## **Primary Microglia Culture**

### *L929-conditioned media*

NCTC Clone L929 fibroblast cells (ATCC® CCL-1™) were grown in the DMEM High Glucose media supplemented with 100 U/mL penicillin plus 100 mg/mL streptomycin and 10% HI-FBS (all from Gibco) in 75 cm<sup>2</sup> TC flasks (Corning). Cells were maintained in a humidified atmosphere of 5% CO<sub>2</sub> at 37°C and allowed to grow to >95% confluence prior to supernatant collection. The supernatants were collected, pooled and passed through a 0.22 $\mu$ m filter (Corning). The fresh filtered supernatants were stored at -20°C. The L929-conditioned media for use in growing mixed-glial cultures was composed of 60% DMEM High Glucose media, 10% HI-FBS, 30% L929 supernatants, and 100 U/mL penicillin plus 100 mg/mL streptomycin.

### *Microglia isolation and differentiation*

The primary microglial cultures were isolated and purified from male mouse brain co-cultures using p0-p2 pups as previously described<sup>20</sup> with slightly modified based on the work from other groups.<sup>20,8,18</sup> Briefly, the cells from brain cortices were processed by Neural tissue dissociation kit (Miltenyi Biotec) according to manufacturer's instructions. The cells were seeded in 75 cm<sup>2</sup> TC flasks pre-coated with poly-D-lysine (100  $\mu$ g/mL; Sigma) and cultured in the L929-conditioned media for 14 days to obtain mixed-glial culture and to differentiate microglia on the astrocyte bed. The loosely adherent microglia were harvested from the culture medium after slight shaking at 500

rpm for 3-4 hours. Microglia were cultured for another 5 days in 90% DMEM/F12 and 10% HI-FBS, supplemented with 100 U/mL penicillin plus 100 mg/mL streptomycin and 2 mM L-glutamine (all from Gibco), as well as 50 ng/mL TGF- $\beta$  (Tonbo Biosciences), 10 ng/mL recombinant M-CSF (R&D Systems), and 1.5  $\mu$ g/mL cholesterol (Avanti Polar Lipids 700000).<sup>6</sup> The cell purity was >95%, measured by flow cytometry.

### **Real-Time Quantitative Reverse-Transcriptase PCR (RT-qPCR)**

Total RNA was isolated from cultured cells using miRNeasy Micro Kit (Qiagen) according to manufacturer's instructions. First strand cDNA was synthesized from 200ng of RNA using SuperScript VILO IV (Thermo Fisher Scientific). An ABI 7500 Fast Real-Time PCR system (Applied Biosystems) was used to carry out RT-qPCR analysis. Primers and probes for genes of interest were obtained from Thermo Fisher Scientific, listed as follows: *Cd74* (Mm00658576\_m1), *Tmem119* (Mm00525305\_m1), *P2ry12* (Mm01950543\_s1), *Sall1* (Mm01950543\_s1), *Gfap* (Mm01253033\_m1), and *Fcrls* (Mm00472833\_m1). *Gapdh* (Mm99999915\_g1) was used as the endogenous control, and cycle time values for genes of interest were normalized to *Gapdh* in the same sample after confirming suitability as a housekeeping gene (mean  $\pm$  SD difference from the mean Ct value of  $0.08 \pm 0.42$  across experiments and conditions). The expression levels of mRNA are presented as fold change versus the control group, as previously described.<sup>16</sup>

### **Naïve T cell Isolation**

Splenocytes were isolated from the spleens of male OT-II mice (B6.Cg Tg(TcraTcrb)425Cbn/J). The spleen was triturated, passed through a 40  $\mu$ m cell strainer (Fisher Scientific), and washed

with complete RPMI media (Gibco) containing 10% HI-FBS, 2 mM L-glutamine, sodium pyruvate, non-essential amino acids,  $\beta$ -Mercaptoethanol, and 100 U/mL penicillin plus 100 mg/mL streptomycin. The red blood cells were then lysed and CD4<sup>+</sup> T-cells were selected for using CD4<sup>+</sup> T Cell Isolation Kit (Miltenyi Biotec) according to manufacturer's instructions. CD4<sup>+</sup> cells were rested at 37°C for at least 1 hr and resuspended at  $2 \times 10^6$  cells/mL in DPBS (Gibco). The volume was then doubled with 10  $\mu$ M CellTrace™ CFSE (Thermo Fisher) in DPBS. The cells were stained with 5  $\mu$ M CFSE for 5 minutes in the dark at room temperature and washed and resuspended in complete RPMI media.

### **T cell-BMDM and T cell-Primary Microglia Co-cultures**

To generate final cultures of differentiated antigen presenting cells (APCs) at similar densities,  $7.5 \times 10^3$  BMDMs and  $4 \times 10^4$  microglia were initially plated in a TC-treated 96-well plate and grown for 7 and 5 days respectively. Prior to co-culture with T cells, APC (BMDMs and microglia) densities were quantified by staining three representative wells for each cell type with 5  $\mu$ g/ml Hoechst 3342 (Thermo Fisher) and imaged on a Leica DMI8 microscope, followed by automated counting of fluorescent nuclei with CellProfiler 3.1.5 (Broad Institute), using three representative images from each well. BMDMs and microglia were pre-incubated with or without 50  $\mu$ g/ml ovalbumin (323-339) (Sigma)  $\pm$  10  $\mu$ g/mL anti-MHCII (BioXCell) at 37°C in 5% CO<sub>2</sub> for 3 hrs. The cells were then irradiated in a XRAD320 cabinet with 34 Gy of radiation and washed with DPBS. CFSE stained OT-II CD4<sup>+</sup> T-cells in complete RPMI were added to each well at a ratio of 1:11 APCs to T-cells. An additional dose of 10  $\mu$ g/mL anti-MHCII was added to any wells pre-incubated with the blocking antibody. These cells were left to co-incubate at 37°C in 5% CO<sub>2</sub> for



72 hrs before being harvested and stained for CD4 1:200 (GK15, BioLegend), CD11b 1:500 (M1/70, Tonbo) viability dye 1:2500 (Invitrogen), for 15-20 minutes on ice and analyzed by flow cytometry. Proliferated CD4<sup>+</sup> T cells were defined as the CD4<sup>hi</sup>CD11b<sup>-</sup>CFSE<sup>lo</sup> population.

SUPPLEMENTAL FIGURES

Supplemental Figure I

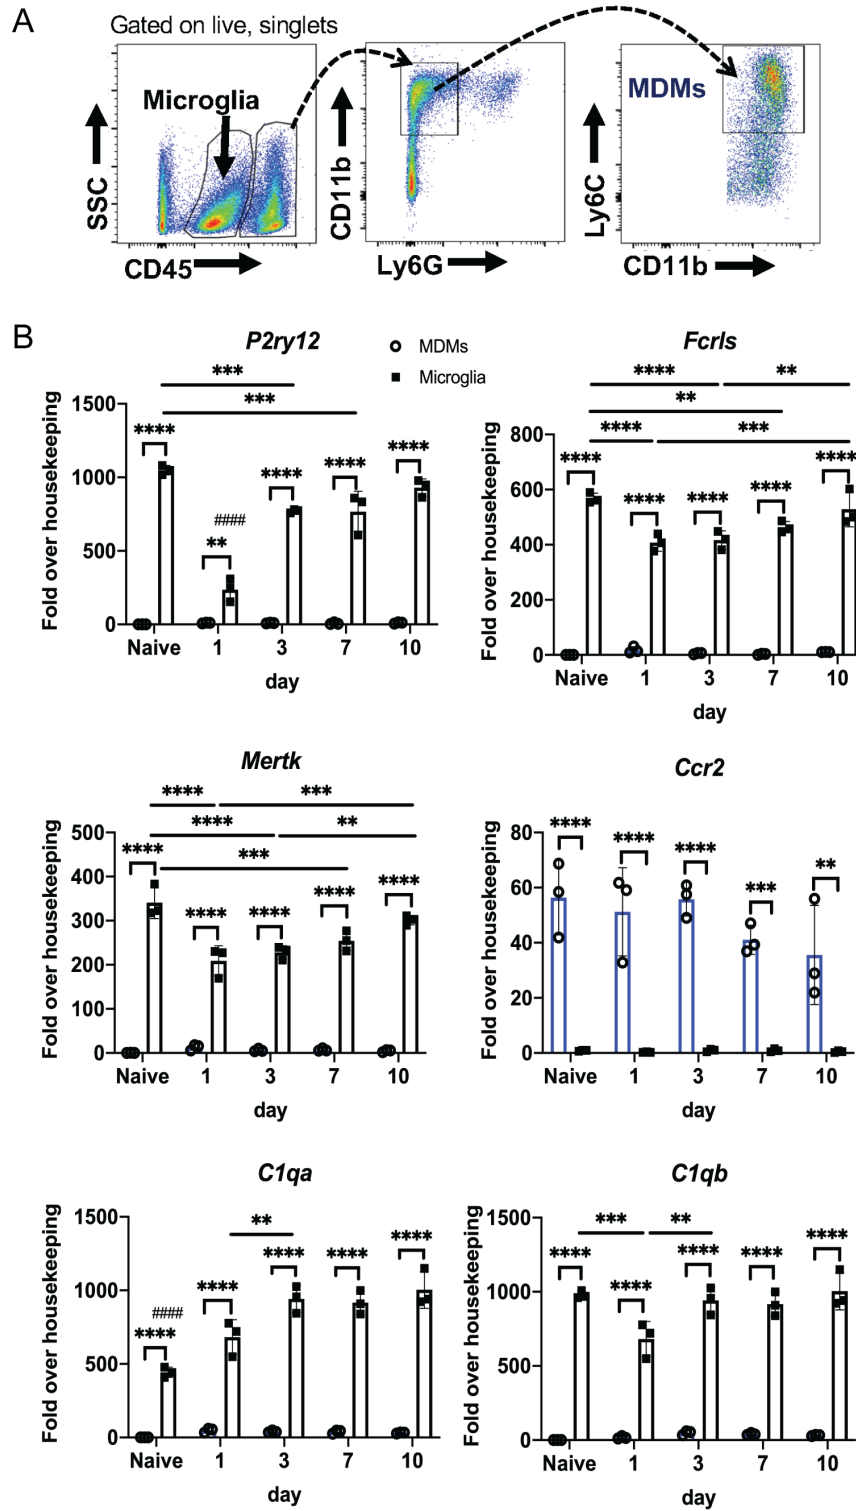

(A) The gating strategy to distinguish microglia and MDMs from ICH brain. Samples were gated on live singlets prior to leukocytes being found by forward and side scatter. Microglia were identified as  $CD45^{\text{intermediate}}CD11b^+$  and MDMs as  $CD45^{\text{high}}CD11b^+Ly6G^-Ly6C^+$ . (B) Gene expression by nanoString confirms high expression of *P2ry12*, *Fcrls*, *Mertk*, *C1qa*, and *C1qb* in microglia and *Ccr2* in macrophages. \*  $p < 0.05$ , \*\*  $p < 0.01$ , \*\*\*  $p < 0.005$ , \*\*\*\*  $p < 0.001$  for each comparison shown, #####  $p < 0.001$  compared to same population at every other time point, by two-way ANOVA with post-hoc Tukey test. Gene expression is reported as fold over housekeeping to normalize for differing cell counts across time points and cell population.

## Supplemental Figure II

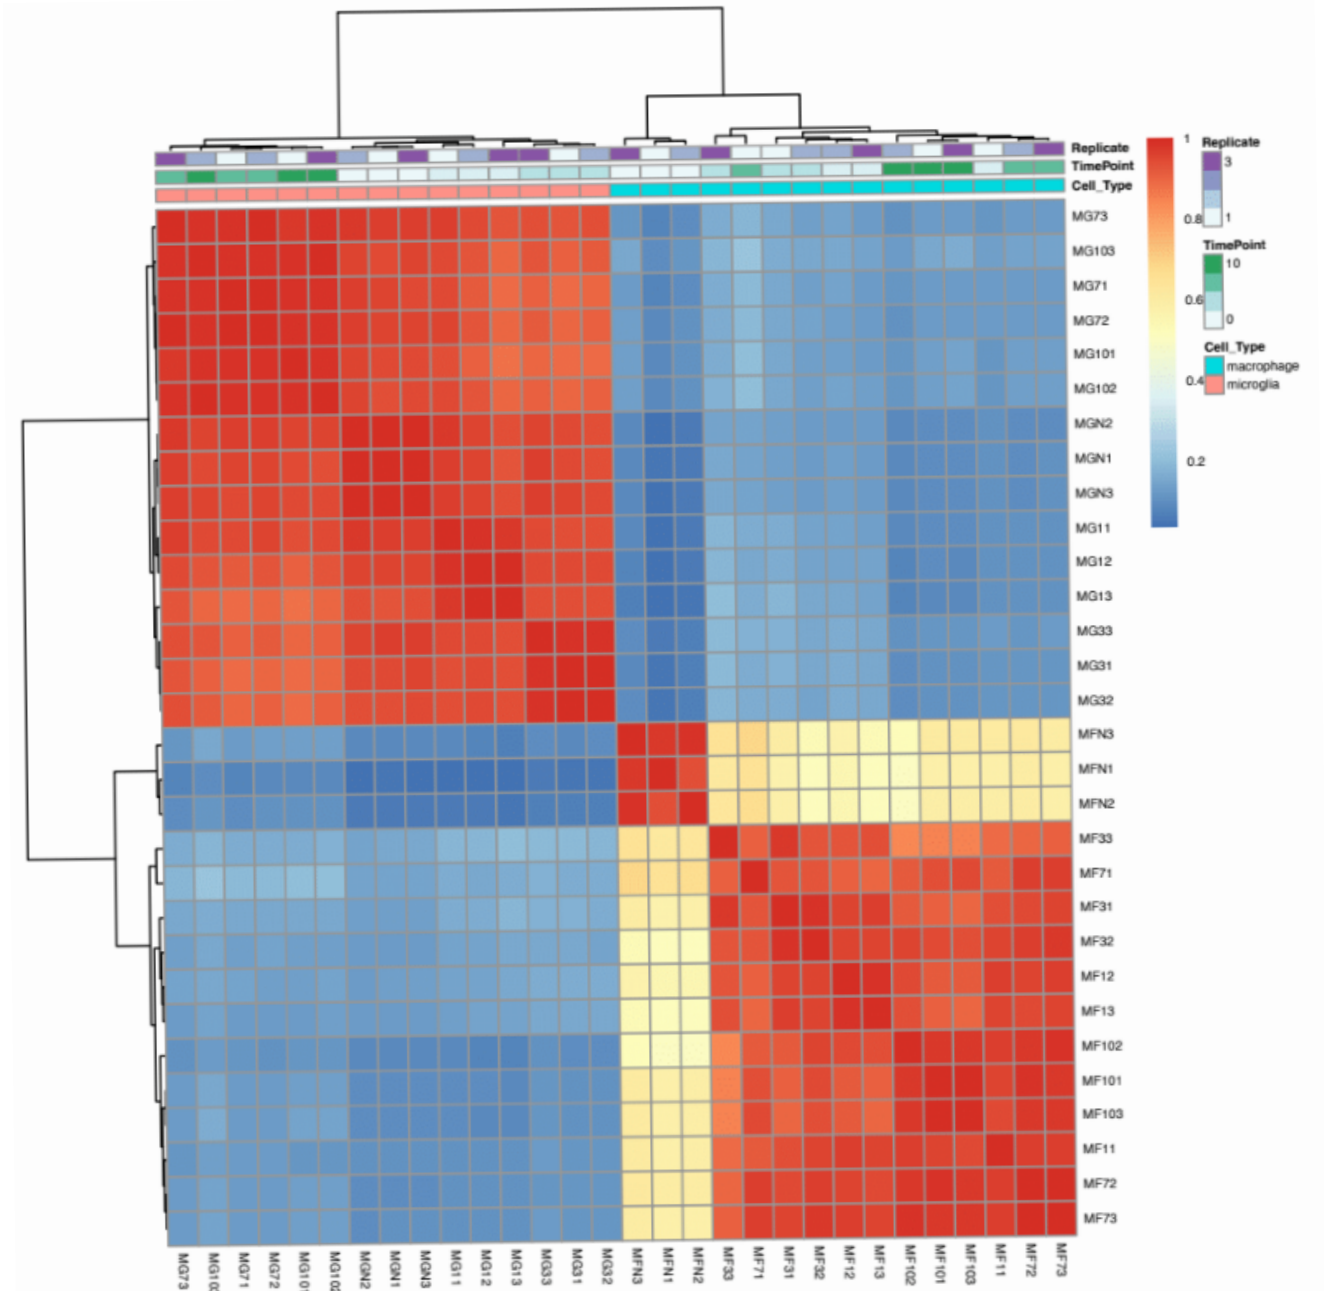

Sample-sample correlation. Pearson correlation values were calculated across all samples pairwise and clustered hierarchically. MF= macrophage, MG= microglia, with the following number indicating time point (days) after ICH or N for naïve, and the final number indicating the biological replicate.

Supplemental Figure III

Day 1

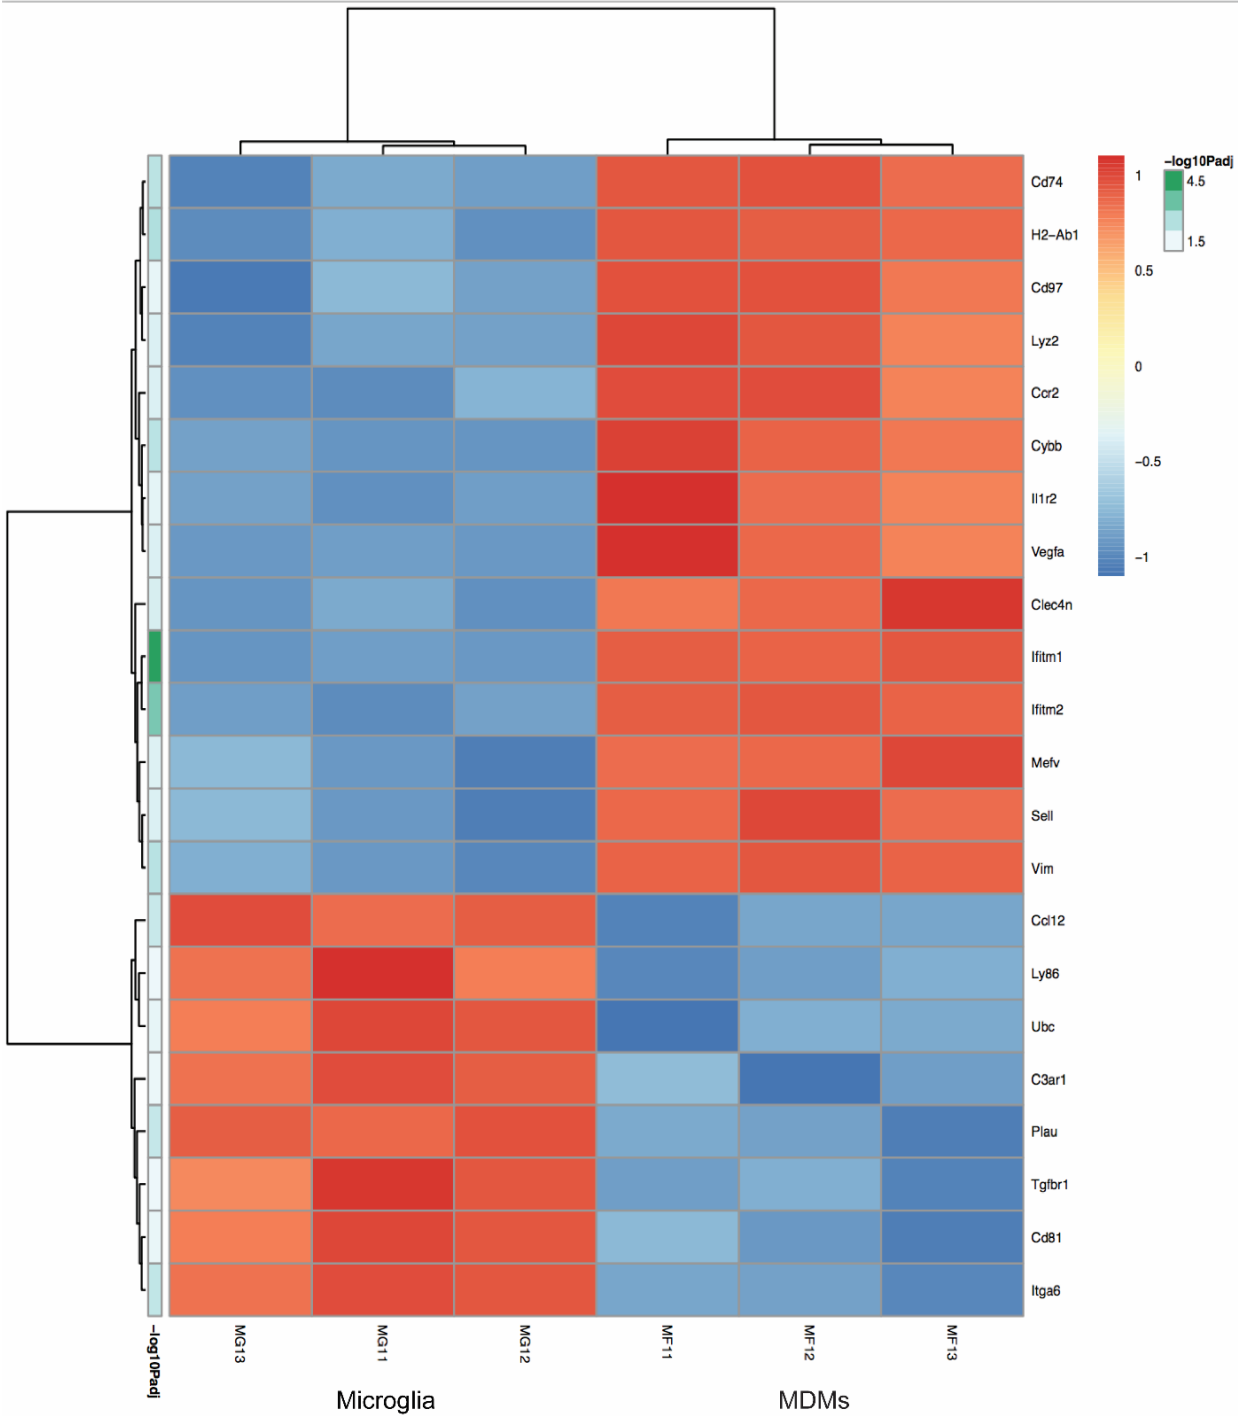

Differential gene expression in microglia and MDMs over time in the day 1 ICH brain

# Supplemental Figure IV

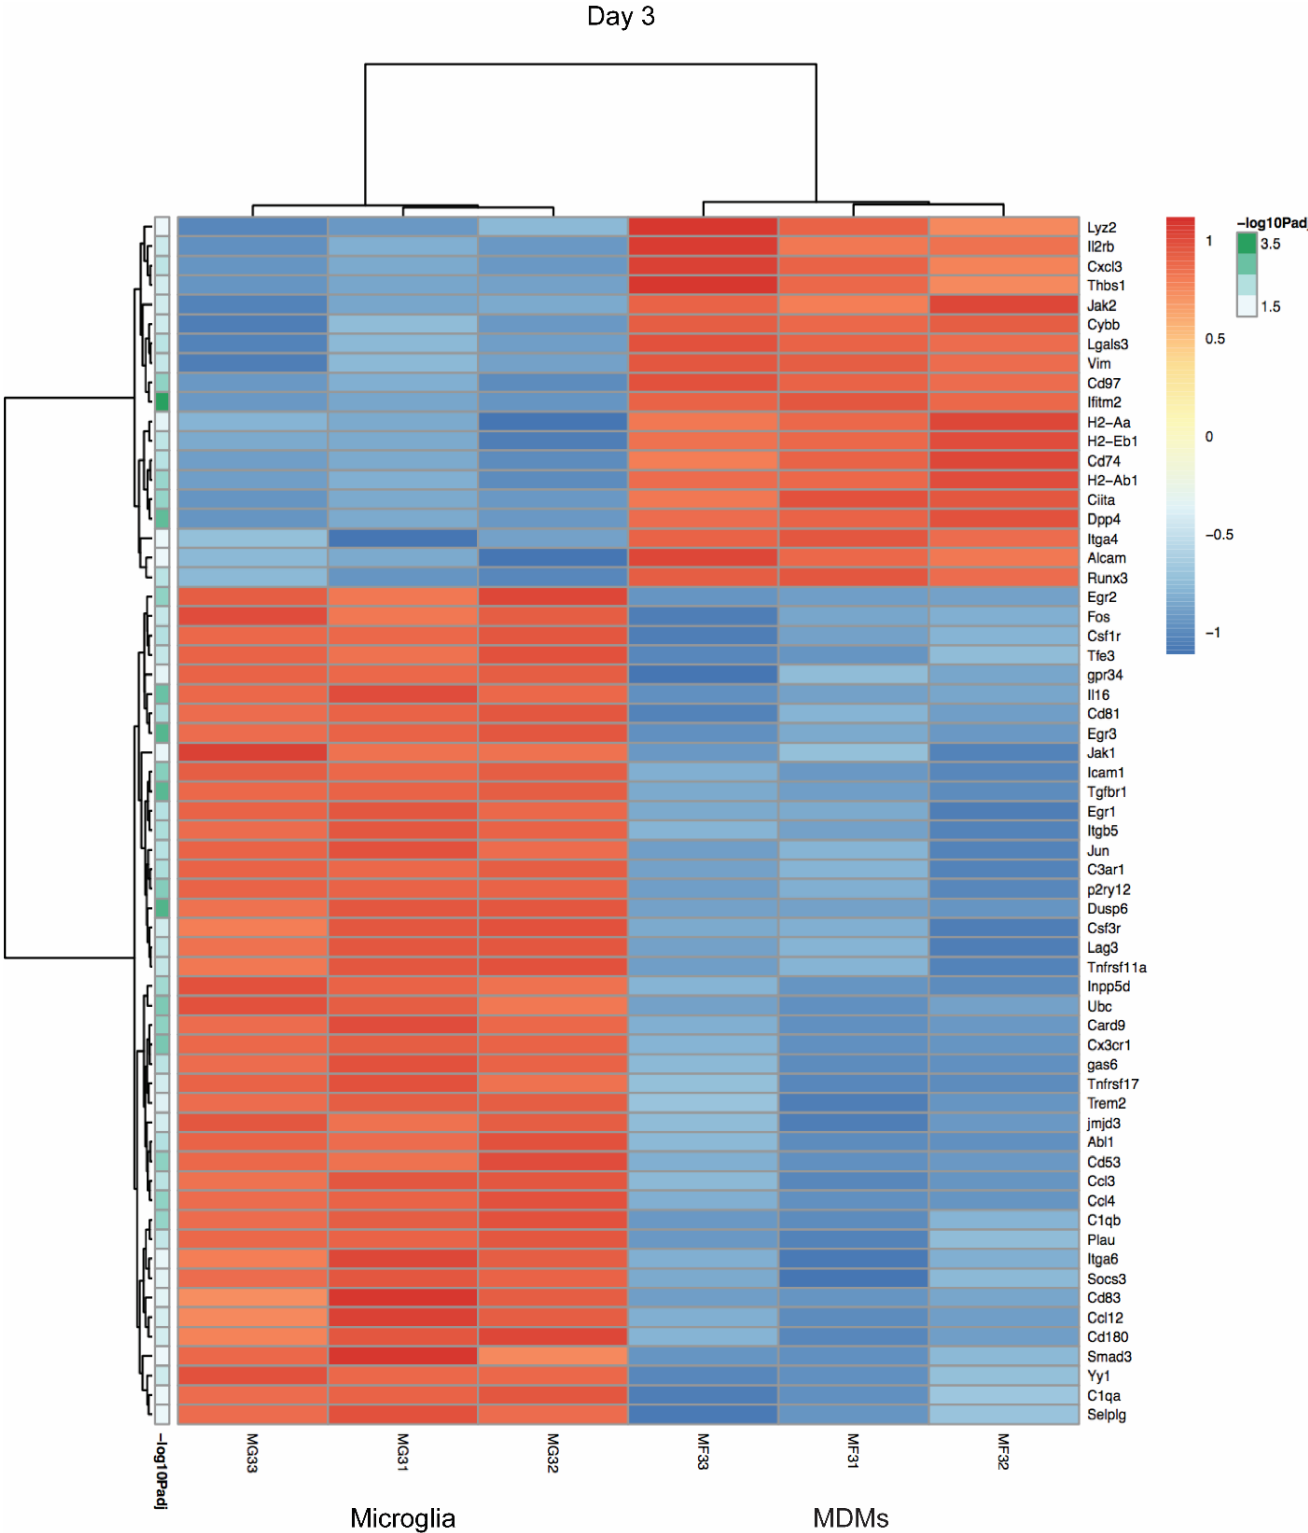

Differential gene expression in microglia and MDMs over time in the day 3 ICH brain

Supplemental Figure V

Day 7

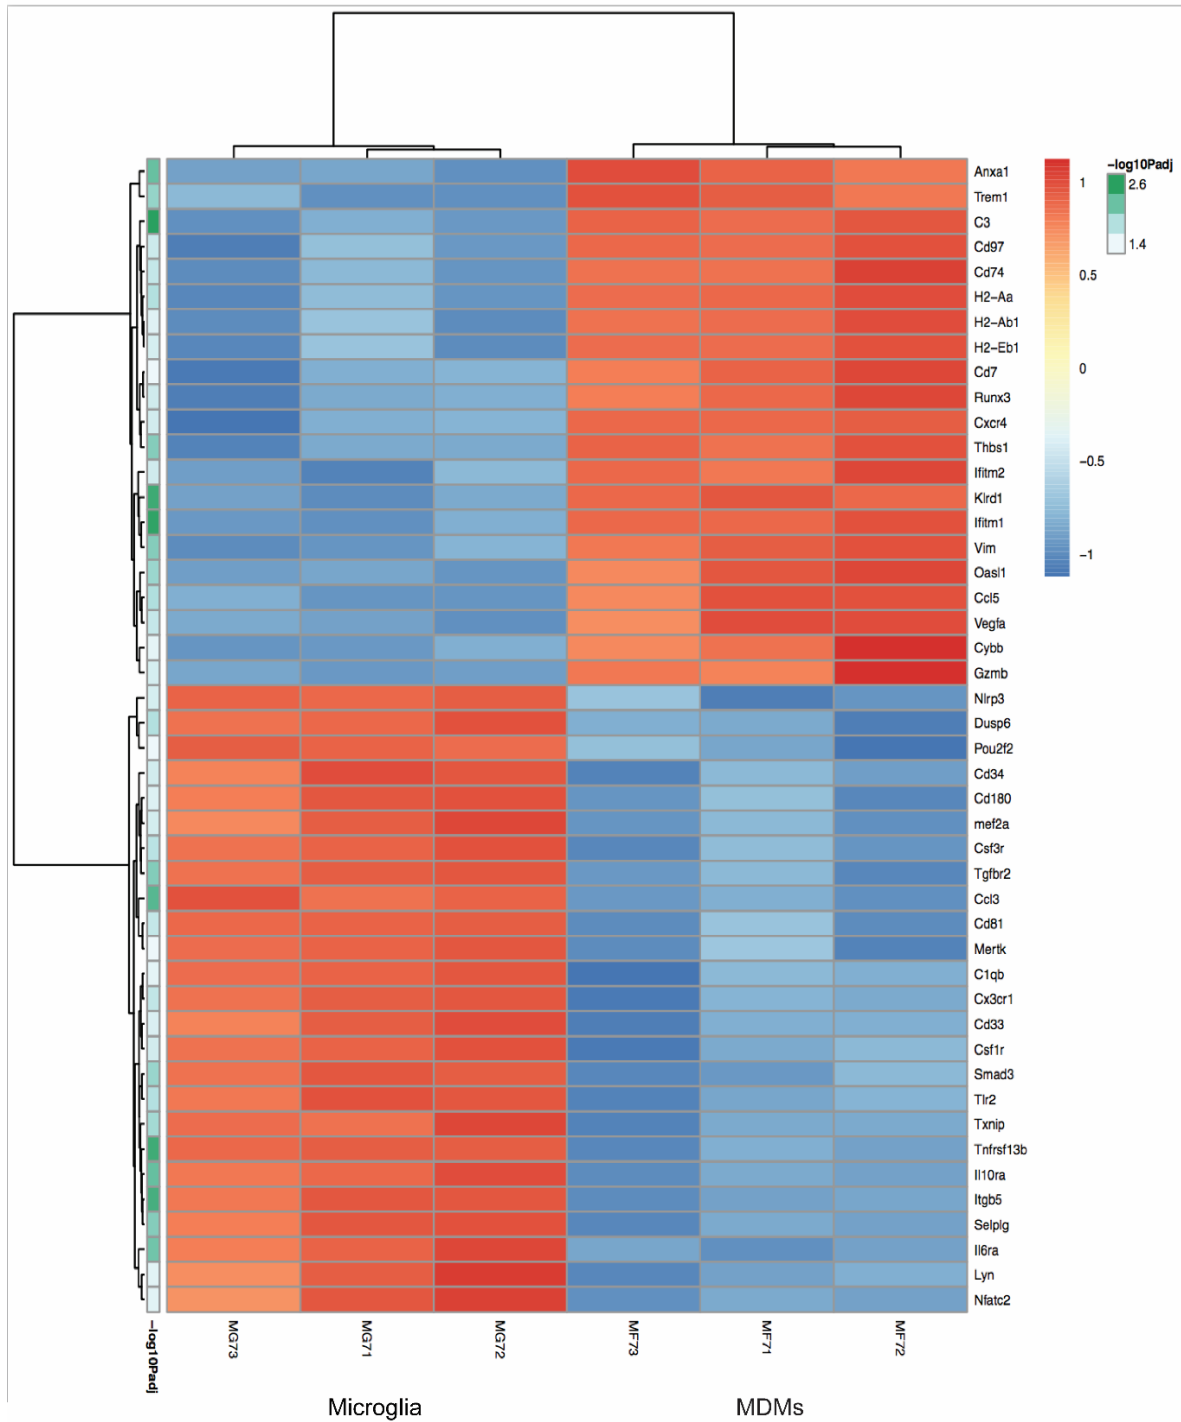

Differential gene expression in microglia and MDMs over time in the day 7 ICH brain

Supplemental Figure VI

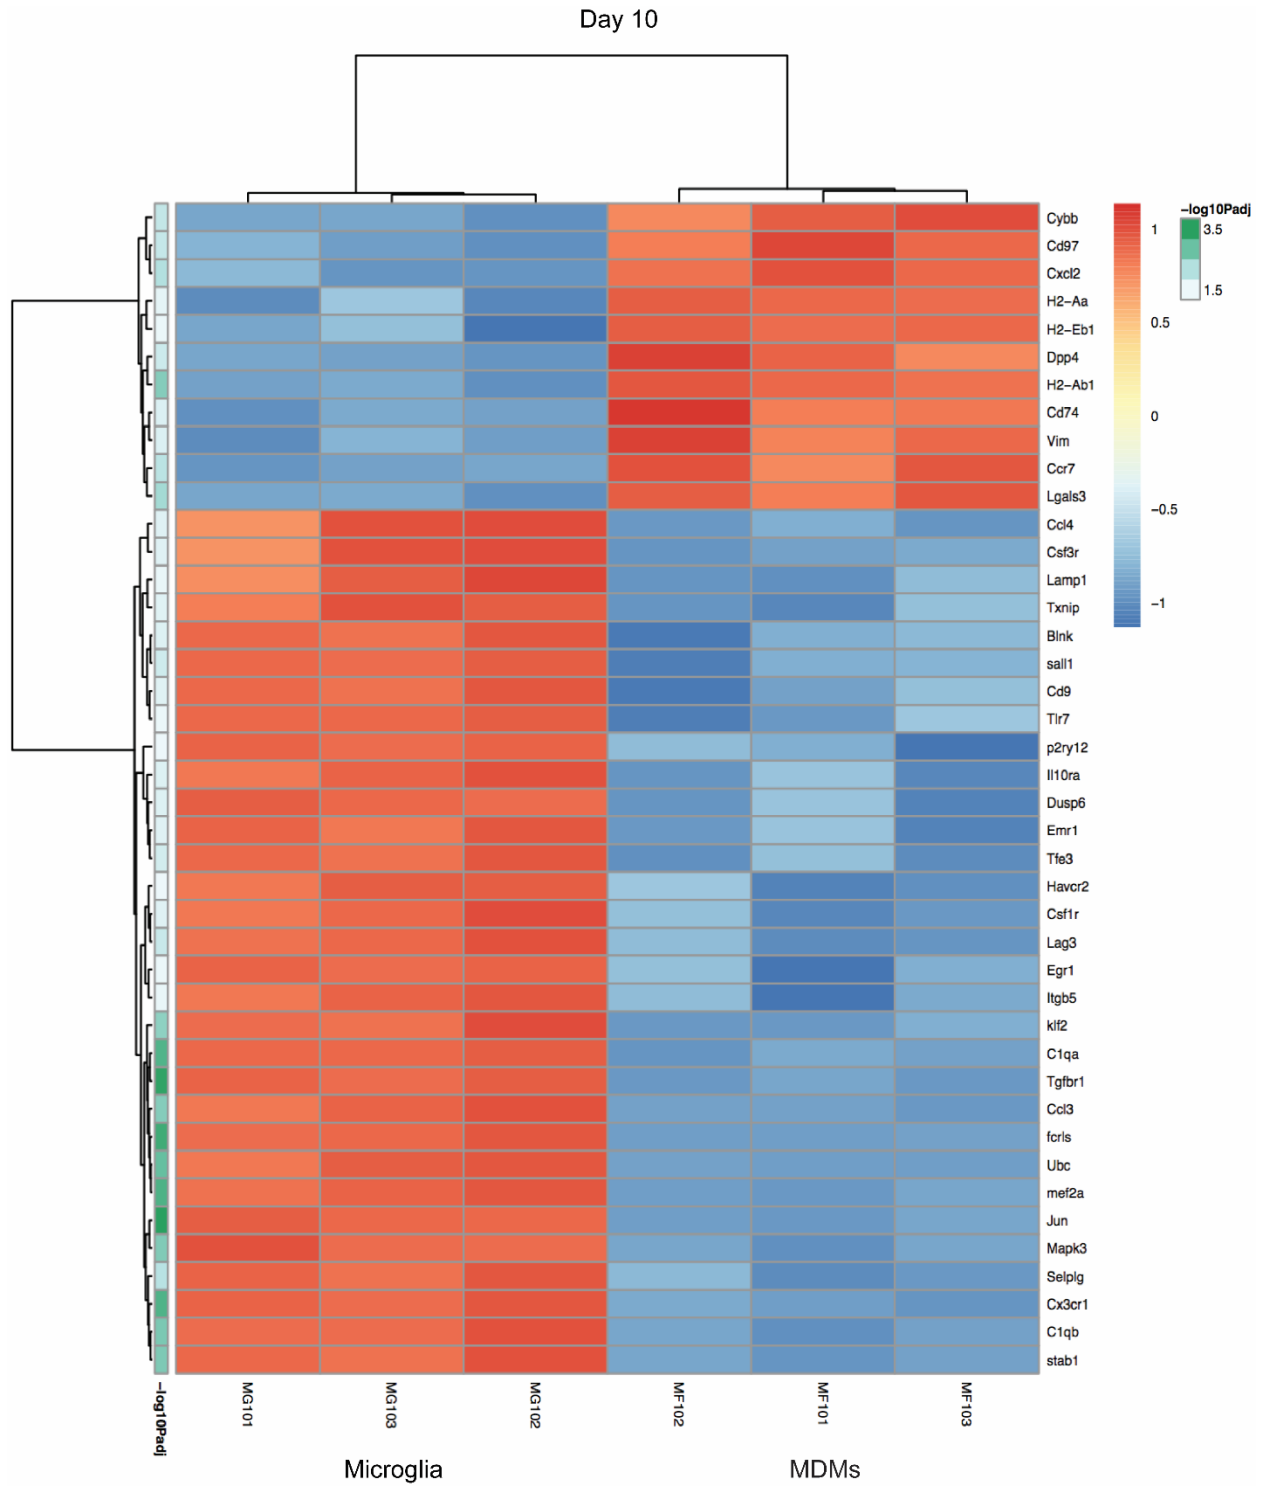

Differential gene expression in microglia and MDMs over time in the day 10 ICH brain



# Supplemental Figure VII

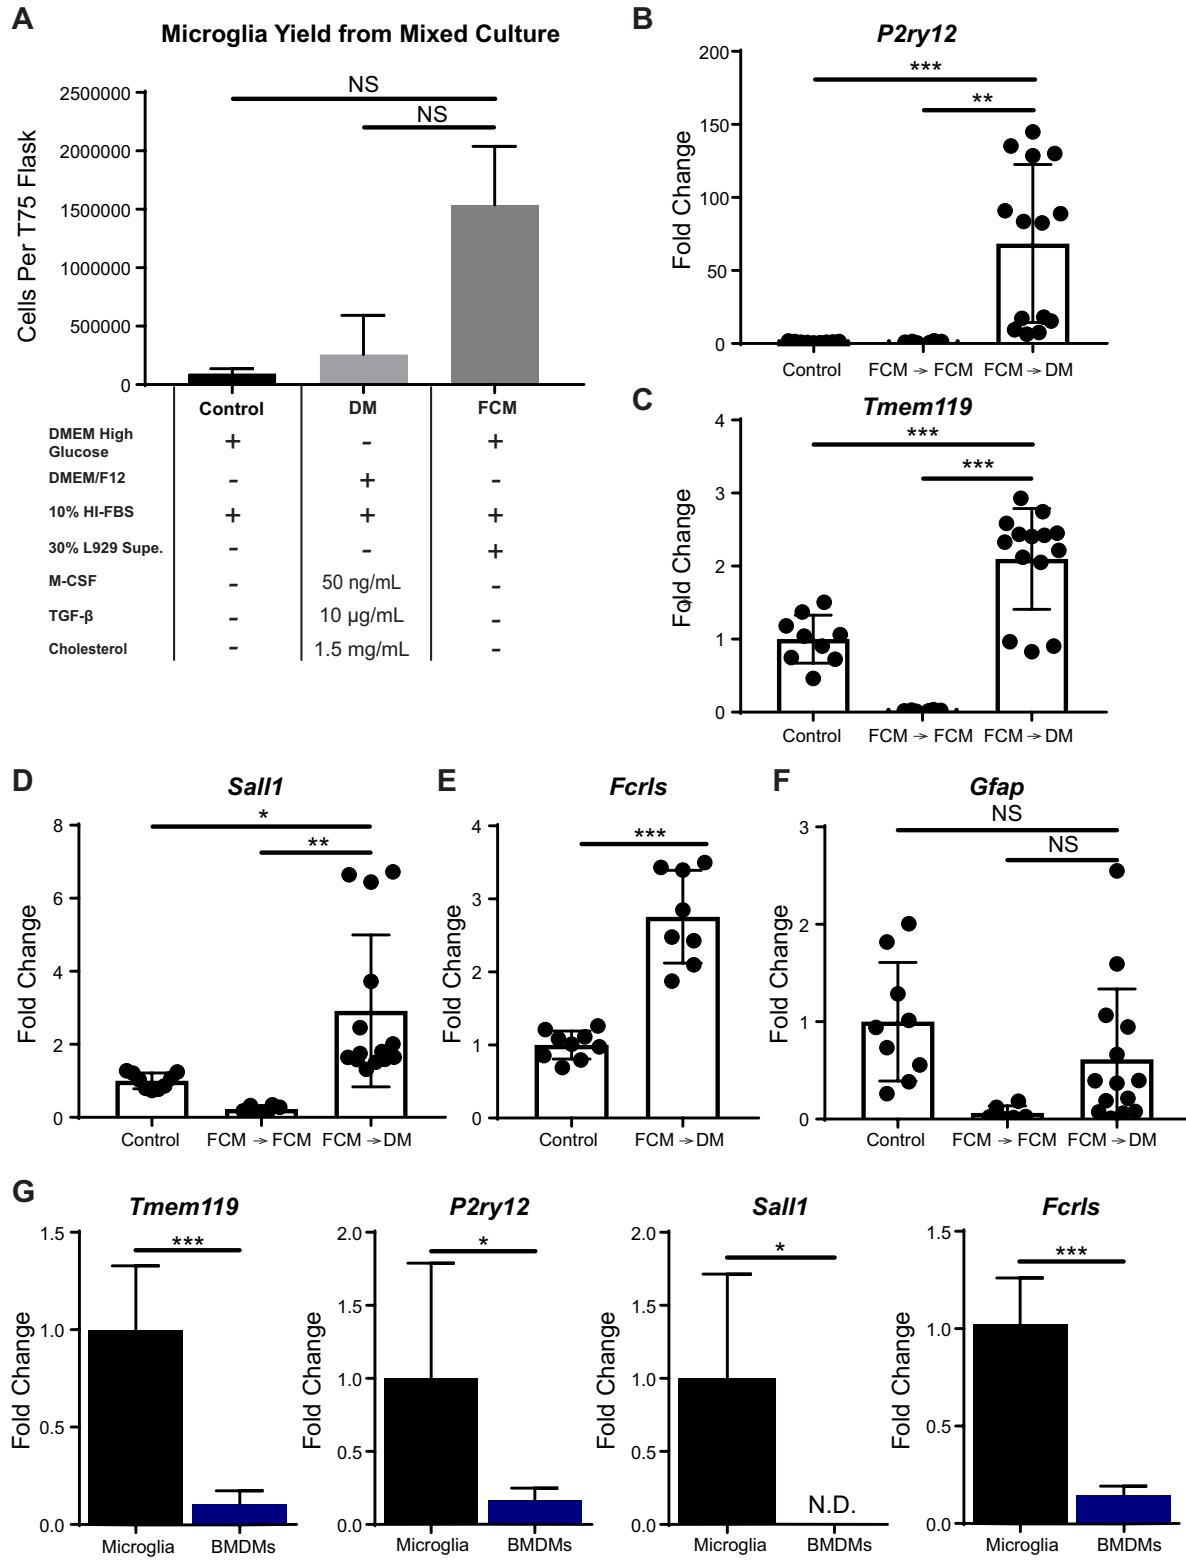

Qualification of murine microglia derived from primary neonatal tissue. (A) Quantification of progenitor cells collected from 14-17 day mixed glial culture, per T75 culture flask, prior to plating. Media composition of mixed glial cultures corresponding to plotted data is shown. DMEM only n=5, defined media n=3, L929 conditioned n=47. (B-E) Gene expression of microglial markers is significantly improved in cells grown under L929 conditioned mixed glial culture conditions (FCM) followed by differentiation in defined media (DM). \*\*\*p<0.001 and \*\* p<0.01 versus DMEM-only culture protocol by one-way ANOVA corrected for multiple comparisons. Control n=9, FCM n=6, FCM to DM n=8-14. (F) Gene expression of astrocyte marker *Gfap* not significantly different under different media conditions. Control n=9, FCM n=6, FCM to DM n=14. (G) Expression of microglia markers are much lower in cultured murine bone marrow derived macrophages (BMDMs) in the microglia culture conditions (FCM to DM). Microglia n=8-14, BMDMs n=3-6. \*\*\* p<0.001 and \* p<0.05 by Student's *t*-test.

**Supplemental Table I. GO functional enrichment for each cell type across time. GO enrichment results for each indicated cell type and time point are shown.**

| Cell Type  | Time   | GO id      | Description                                                                                                               | q-value  |
|------------|--------|------------|---------------------------------------------------------------------------------------------------------------------------|----------|
| Macrophage | Naïve  | GO:0009897 | external side of plasma membrane                                                                                          | 6.88E-13 |
| Macrophage | Naïve  | GO:0045087 | innate immune response                                                                                                    | 1.25E-11 |
| Macrophage | Naïve  | GO:0050870 | positive regulation of T cell activation                                                                                  | 6.95E-11 |
| Macrophage | Naïve  | GO:0050863 | regulation of T cell activation                                                                                           | 2.17E-10 |
| Macrophage | Naïve  | GO:0019886 | antigen processing and presentation of exogenous peptide antigen via MHC class II                                         | 1.37E-09 |
| Macrophage | Naïve  | GO:0051251 | positive regulation of lymphocyte activation                                                                              | 1.37E-09 |
| Macrophage | Naïve  | GO:0002443 | leukocyte mediated immunity                                                                                               | 2.53E-09 |
| Macrophage | Naïve  | GO:0002696 | positive regulation of leukocyte activation                                                                               | 3.09E-09 |
| Macrophage | Naïve  | GO:0042098 | T cell proliferation                                                                                                      | 3.12E-09 |
| Macrophage | Naïve  | GO:0002495 | antigen processing and presentation of peptide antigen via MHC class II                                                   | 3.37E-09 |
| Macrophage | Day 1  | GO:0002495 | antigen processing and presentation of peptide antigen via MHC class II                                                   | 1.91E-09 |
| Macrophage | Day 1  | GO:0002504 | antigen processing and presentation of peptide or polysaccharide antigen via MHC class II                                 | 1.91E-09 |
| Macrophage | Day 1  | GO:0019886 | antigen processing and presentation of exogenous peptide antigen via MHC class II                                         | 1.02E-07 |
| Macrophage | Day 1  | GO:0002687 | positive regulation of leukocyte migration                                                                                | 1.65E-07 |
| Macrophage | Day 1  | GO:0002478 | antigen processing and presentation of exogenous peptide antigen                                                          | 6.18E-07 |
| Macrophage | Day 1  | GO:0048002 | antigen processing and presentation of peptide antigen                                                                    | 6.91E-07 |
| Macrophage | Day 1  | GO:0045087 | innate immune response                                                                                                    | 6.91E-07 |
| Macrophage | Day 1  | GO:0002685 | regulation of leukocyte migration                                                                                         | 6.91E-07 |
| Macrophage | Day 1  | GO:0019884 | antigen processing and presentation of exogenous antigen                                                                  | 1.35E-06 |
| Macrophage | Day 1  | GO:0050900 | leukocyte migration                                                                                                       | 1.46E-06 |
| Macrophage | Day 3  | GO:0002504 | antigen processing and presentation of peptide or polysaccharide antigen via MHC class II                                 | 1.78E-11 |
| Macrophage | Day 3  | GO:0050867 | positive regulation of cell activation                                                                                    | 1.78E-11 |
| Macrophage | Day 3  | GO:0002696 | positive regulation of leukocyte activation                                                                               | 3.19E-10 |
| Macrophage | Day 3  | GO:0019886 | antigen processing and presentation of exogenous peptide antigen via MHC class II                                         | 3.75E-10 |
| Macrophage | Day 3  | GO:0002495 | antigen processing and presentation of peptide antigen via MHC class II                                                   | 1.23E-09 |
| Macrophage | Day 3  | GO:0051251 | positive regulation of lymphocyte activation                                                                              | 2.37E-09 |
| Macrophage | Day 3  | GO:0009897 | external side of plasma membrane                                                                                          | 3.00E-09 |
| Macrophage | Day 3  | GO:0002478 | antigen processing and presentation of exogenous peptide antigen                                                          | 3.36E-09 |
| Macrophage | Day 3  | GO:0050870 | positive regulation of T cell activation                                                                                  | 3.47E-09 |
| Macrophage | Day 3  | GO:0002449 | lymphocyte mediated immunity                                                                                              | 1.02E-08 |
| Macrophage | Day 7  | GO:0002504 | antigen processing and presentation of peptide or polysaccharide antigen via MHC class II                                 | 3.54E-11 |
| Macrophage | Day 7  | GO:0019882 | antigen processing and presentation                                                                                       | 7.07E-10 |
| Macrophage | Day 7  | GO:0019886 | antigen processing and presentation of exogenous peptide antigen via MHC class II                                         | 7.07E-10 |
| Macrophage | Day 7  | GO:0002495 | antigen processing and presentation of peptide antigen via MHC class II                                                   | 2.12E-09 |
| Macrophage | Day 7  | GO:0002478 | antigen processing and presentation of exogenous peptide antigen                                                          | 7.39E-09 |
| Macrophage | Day 7  | GO:0048002 | antigen processing and presentation of peptide antigen                                                                    | 2.72E-08 |
| Macrophage | Day 7  | GO:0019884 | antigen processing and presentation of exogenous antigen                                                                  | 2.86E-08 |
| Macrophage | Day 7  | GO:0002460 | adaptive immune response based on somatic recombination of immune receptors built from immunoglobulin superfamily domains | 5.85E-08 |
| Macrophage | Day 7  | GO:0042611 | MHC protein complex                                                                                                       | 5.89E-08 |
| Macrophage | Day 7  | GO:0002443 | leukocyte mediated immunity                                                                                               | 1.89E-07 |
| Macrophage | Day 10 | GO:0019886 | antigen processing and presentation of exogenous peptide antigen via MHC class II                                         | 3.39E-10 |
| Macrophage | Day 10 | GO:0002495 | antigen processing and presentation of peptide antigen via MHC class II                                                   | 6.97E-10 |
| Macrophage | Day 10 | GO:0002504 | antigen processing and presentation of peptide or polysaccharide antigen via MHC class II                                 | 6.97E-10 |
| Macrophage | Day 10 | GO:0002478 | antigen processing and presentation of exogenous peptide antigen                                                          | 1.52E-09 |
| Macrophage | Day 10 | GO:0019884 | antigen processing and presentation of exogenous antigen                                                                  | 6.61E-09 |
| Macrophage | Day 10 | GO:0019882 | antigen processing and presentation                                                                                       | 1.78E-07 |
| Macrophage | Day 10 | GO:0048002 | antigen processing and presentation of peptide antigen                                                                    | 3.57E-07 |
| Macrophage | Day 10 | GO:1990266 | neutrophil migration                                                                                                      | 5.41E-07 |
| Macrophage | Day 10 | GO:0030593 | neutrophil chemotaxis                                                                                                     | 5.41E-07 |
| Macrophage | Day 10 | GO:0050870 | positive regulation of T cell activation                                                                                  | 1.24E-06 |

Microglia continued on next page.

|           |        |            |                                                      |             |
|-----------|--------|------------|------------------------------------------------------|-------------|
| Microglia | Naïve  | GO:0051272 | positive regulation of cellular component movement   | 4.30E-13    |
| Microglia | Naïve  | GO:0050900 | leukocyte migration                                  | 4.30E-13    |
| Microglia | Naïve  | GO:1902105 | regulation of leukocyte differentiation              | 4.38E-13    |
| Microglia | Naïve  | GO:0030335 | positive regulation of cell migration                | 2.06E-12    |
| Microglia | Naïve  | GO:2000147 | positive regulation of cell motility                 | 2.33E-12    |
| Microglia | Naïve  | GO:0030595 | leukocyte chemotaxis                                 | 4.75E-12    |
| Microglia | Naïve  | GO:0060326 | cell chemotaxis                                      | 9.01E-12    |
| Microglia | Naïve  | GO:0071219 | cellular response to molecule of bacterial origin    | 9.01E-12    |
| Microglia | Naïve  | GO:0002237 | response to molecule of bacterial origin             | 1.29E-11    |
| Microglia | Naïve  | GO:0097529 | myeloid leukocyte migration                          | 1.36E-11    |
| Microglia | Day 1  | GO:0032103 | positive regulation of response to external stimulus | 0.001659458 |
| Microglia | Day 1  | GO:0009897 | external side of plasma membrane                     | 0.007033321 |
| Microglia | Day 1  | GO:1901623 | regulation of lymphocyte chemotaxis                  | 0.007033321 |
| Microglia | Day 1  | GO:0002688 | regulation of leukocyte chemotaxis                   | 0.007864568 |
| Microglia | Day 1  | GO:0048247 | lymphocyte chemotaxis                                | 0.01281474  |
| Microglia | Day 1  | GO:0050900 | leukocyte migration                                  | 0.018936428 |
| Microglia | Day 1  | GO:2000401 | regulation of lymphocyte migration                   | 0.019370388 |
| Microglia | Day 1  | GO:0002685 | regulation of leukocyte migration                    | 0.025663873 |
| Microglia | Day 1  | GO:0097529 | myeloid leukocyte migration                          | 0.025663873 |
| Microglia | Day 1  | GO:0050920 | regulation of chemotaxis                             | 0.034010915 |
| Microglia | Day 3  | GO:0032103 | positive regulation of response to external stimulus | 4.28E-11    |
| Microglia | Day 3  | GO:0050900 | leukocyte migration                                  | 1.43E-10    |
| Microglia | Day 3  | GO:0002573 | myeloid leukocyte differentiation                    | 1.78E-10    |
| Microglia | Day 3  | GO:0030099 | myeloid cell differentiation                         | 3.37E-10    |
| Microglia | Day 3  | GO:0060326 | cell chemotaxis                                      | 3.42E-10    |
| Microglia | Day 3  | GO:0045637 | regulation of myeloid cell differentiation           | 1.99E-09    |
| Microglia | Day 3  | GO:1902105 | regulation of leukocyte differentiation              | 2.06E-09    |
| Microglia | Day 3  | GO:0030316 | osteoclast differentiation                           | 2.43E-09    |
| Microglia | Day 3  | GO:0030595 | leukocyte chemotaxis                                 | 6.45E-09    |
| Microglia | Day 3  | GO:0002761 | regulation of myeloid leukocyte differentiation      | 1.69E-08    |
| Microglia | Day 7  | GO:0009306 | protein secretion                                    | 9.49E-08    |
| Microglia | Day 7  | GO:0050707 | regulation of cytokine secretion                     | 1.51E-07    |
| Microglia | Day 7  | GO:0050663 | cytokine secretion                                   | 3.48E-07    |
| Microglia | Day 7  | GO:0050715 | positive regulation of cytokine secretion            | 3.63E-07    |
| Microglia | Day 7  | GO:0050900 | leukocyte migration                                  | 1.16E-06    |
| Microglia | Day 7  | GO:0050708 | regulation of protein secretion                      | 2.41E-06    |
| Microglia | Day 7  | GO:0050714 | positive regulation of protein secretion             | 3.92E-06    |
| Microglia | Day 7  | GO:0071216 | cellular response to biotic stimulus                 | 9.35E-06    |
| Microglia | Day 7  | GO:0042113 | B cell activation                                    | 1.76E-05    |
| Microglia | Day 7  | GO:0051222 | positive regulation of protein transport             | 2.00E-05    |
| Microglia | Day 10 | GO:0002761 | regulation of myeloid leukocyte differentiation      | 1.22E-06    |
| Microglia | Day 10 | GO:0002573 | myeloid leukocyte differentiation                    | 1.22E-06    |
| Microglia | Day 10 | GO:0032103 | positive regulation of response to external stimulus | 1.74E-06    |
| Microglia | Day 10 | GO:0030099 | myeloid cell differentiation                         | 6.15E-06    |
| Microglia | Day 10 | GO:0045637 | regulation of myeloid cell differentiation           | 1.08E-05    |
| Microglia | Day 10 | GO:0009897 | external side of plasma membrane                     | 3.90E-05    |
| Microglia | Day 10 | GO:0050900 | leukocyte migration                                  | 5.59E-05    |
| Microglia | Day 10 | GO:0030595 | leukocyte chemotaxis                                 | 5.59E-05    |
| Microglia | Day 10 | GO:1902105 | regulation of leukocyte differentiation              | 6.31E-05    |
| Microglia | Day 10 | GO:0001819 | positive regulation of cytokine production           | 6.31E-05    |

**Supplemental Table II. GSEA results.** GSEA was performed for each indicated cell type and time point. Only significant results (FDR 1-val < 0.2) are shown.

Supplemental Table 2: GSEA results (FDR q-val < 0.2).

| TIME   | ENRICHED IN | NAME                                                                              | SIZE | ES      | NES     | NOM p-val | FDR q-val | FWER p-val |
|--------|-------------|-----------------------------------------------------------------------------------|------|---------|---------|-----------|-----------|------------|
| Day 0  | Macrophage  | REACTOME_CELL_SURFACE_INTERACTIONS_AT_THE_VASCULAR_WALL                           | 21   | 0.6393  | 1.8426  | 0.0000    | 0.0519    | 0.103      |
| Day 1  | Microglia   | BIOCARTA_MAPK_PATHWAY                                                             | 28   | -0.4475 | -1.7146 | 0.0230    | 0.1944    | 0.172      |
| Day 1  | Macrophage  | REACTOME_CHEMOKINE_RECEPTORS_BIND_CHEMOKINES                                      | 24   | 0.6543  | 1.6517  | 0.0033    | 0.0689    | 0.241      |
| Day 1  | Macrophage  | PID_CD8_TCR_PATHWAY                                                               | 16   | 0.6579  | 1.5441  | 0.0097    | 0.0815    | 0.747      |
| Day 1  | Macrophage  | REACTOME_IMMUNOREGULATORY_INTERACTIONS_BETWEEN_A_LYMPHOID_AND_A_NON_LYMPHOID_CELL | 21   | 0.6192  | 1.5530  | 0.0181    | 0.0825    | 0.703      |
| Day 1  | Macrophage  | REACTOME_CELL_SURFACE_INTERACTIONS_AT_THE_VASCULAR_WALL                           | 21   | 0.6546  | 1.6147  | 0.0057    | 0.0827    | 0.4        |
| Day 1  | Macrophage  | REACTOME_G_ALPHA_I_SIGNALLING_EVENTS                                              | 21   | 0.6341  | 1.5774  | 0.0056    | 0.0847    | 0.58       |
| Day 1  | Macrophage  | REACTOME_CLASS_A1_RHODOPSIN_LIKE_RECEPTORS                                        | 30   | 0.5893  | 1.5558  | 0.0075    | 0.0932    | 0.691      |
| Day 1  | Macrophage  | REACTOME_GPCR_LIGAND_BINDING                                                      | 32   | 0.6020  | 1.5852  | 0.0055    | 0.0954    | 0.545      |
| Day 1  | Macrophage  | REACTOME_PEPTIDE_LIGAND_BINDING_RECEPTORS                                         | 28   | 0.6336  | 1.6646  | 0.0000    | 0.1121    | 0.202      |
| Day 1  | Macrophage  | KEGG_CHEMOKINE_SIGNALING_PATHWAY                                                  | 50   | 0.5324  | 1.4637  | 0.0123    | 0.1792    | 0.968      |
| Day 1  | Macrophage  | NABA_MATRISOME                                                                    | 53   | 0.5089  | 1.4206  | 0.0175    | 0.1897    | 0.993      |
| Day 1  | Macrophage  | REACTOME_GPCR_DOWNSTREAM_SIGNALING                                                | 29   | 0.5494  | 1.4250  | 0.0410    | 0.1977    | 0.993      |
| Day 3  | Microglia   | BIOCARTA_TOLL_PATHWAY                                                             | 25   | -0.4871 | -1.7654 | 0.0030    | 0.1140    | 0.264      |
| Day 3  | Microglia   | KEGG_COLORECTAL_CANCER                                                            | 19   | -0.5072 | -1.7224 | 0.0136    | 0.1145    | 0.351      |
| Day 3  | Microglia   | BIOCARTA_NTHI_PATHWAY                                                             | 17   | -0.5221 | -1.7296 | 0.0085    | 0.1274    | 0.338      |
| Day 3  | Microglia   | BIOCARTA_P38MAPK_PATHWAY                                                          | 15   | -0.5479 | -1.6869 | 0.0262    | 0.1277    | 0.423      |
| Day 3  | Microglia   | REACTOME_MYD88_MAL_CASCADE_INITIATED_ON_PLASMA_MEMBRANE                           | 37   | -0.4410 | -1.7684 | 0.0109    | 0.1384    | 0.256      |
| Day 3  | Microglia   | REACTOME_ACTIVATED_TLR4_SIGNALLING                                                | 45   | -0.3827 | -1.6418 | 0.0076    | 0.1539    | 0.519      |
| Day 3  | Microglia   | KEGG_WNT_SIGNALING_PATHWAY                                                        | 17   | -0.5474 | -1.7866 | 0.0085    | 0.1598    | 0.226      |
| Day 3  | Microglia   | BIOCARTA KERATINOCYTE_PATHWAY                                                     | 24   | -0.4339 | -1.5795 | 0.0380    | 0.1635    | 0.694      |
| Day 3  | Microglia   | PID_AP1_PATHWAY                                                                   | 18   | -0.4914 | -1.5818 | 0.0413    | 0.1744    | 0.689      |
| Day 3  | Microglia   | KEGG_MAPK_SIGNALING_PATHWAY                                                       | 41   | -0.3907 | -1.5926 | 0.0172    | 0.1747    | 0.654      |
| Day 3  | Microglia   | REACTOME_MAP_KINASE_ACTIVATION_IN_TLR_CASCADE                                     | 21   | -0.4673 | -1.5968 | 0.0096    | 0.1876    | 0.645      |
| Day 3  | Macrophage  | REACTOME_PEPTIDE_LIGAND_BINDING_RECEPTORS                                         | 28   | 0.5681  | 1.7963  | 0.0030    | 0.0548    | 0.243      |
| Day 3  | Macrophage  | REACTOME_G_ALPHA_I_SIGNALLING_EVENTS                                              | 21   | 0.6053  | 1.8141  | 0.0046    | 0.0603    | 0.182      |
| Day 3  | Macrophage  | REACTOME_CHEMOKINE_RECEPTORS_BIND_CHEMOKINES                                      | 24   | 0.5947  | 1.8527  | 0.0030    | 0.0754    | 0.116      |
| Day 3  | Macrophage  | REACTOME_CELL_SURFACE_INTERACTIONS_AT_THE_VASCULAR_WALL                           | 21   | 0.5793  | 1.7253  | 0.0030    | 0.0856    | 0.423      |
| Day 3  | Macrophage  | REACTOME_GPCR_LIGAND_BINDING                                                      | 32   | 0.5056  | 1.6569  | 0.0144    | 0.1265    | 0.644      |
| Day 3  | Macrophage  | REACTOME_CLASS_A1_RHODOPSIN_LIKE_RECEPTORS                                        | 30   | 0.4973  | 1.6188  | 0.0230    | 0.1472    | 0.757      |
| Day 7  | Macrophage  | REACTOME_G_ALPHA_I_SIGNALLING_EVENTS                                              | 21   | 0.5735  | 1.7859  | 0.0062    | 0.0683    | 0.289      |
| Day 7  | Macrophage  | REACTOME_PEPTIDE_LIGAND_BINDING_RECEPTORS                                         | 28   | 0.5534  | 1.8102  | 0.0045    | 0.0776    | 0.23       |
| Day 7  | Macrophage  | REACTOME_GPCR_LIGAND_BINDING                                                      | 32   | 0.4976  | 1.6707  | 0.0097    | 0.1221    | 0.625      |
| Day 7  | Macrophage  | REACTOME_CELL_SURFACE_INTERACTIONS_AT_THE_VASCULAR_WALL                           | 21   | 0.5609  | 1.6920  | 0.0096    | 0.1293    | 0.558      |
| Day 7  | Macrophage  | REACTOME_IMMUNOREGULATORY_INTERACTIONS_BETWEEN_A_LYMPHOID_AND_A_NON_LYMPHOID_CELL | 21   | 0.5335  | 1.6389  | 0.0275    | 0.1349    | 0.738      |
| Day 7  | Macrophage  | REACTOME_CLASS_A1_RHODOPSIN_LIKE_RECEPTORS                                        | 30   | 0.4924  | 1.6009  | 0.0148    | 0.1535    | 0.83       |
| Day 7  | Macrophage  | REACTOME_CHEMOKINE_RECEPTORS_BIND_CHEMOKINES                                      | 24   | 0.5685  | 1.8112  | 0.0030    | 0.1541    | 0.228      |
| Day 10 | Microglia   | BIOCARTA_BCR_PATHWAY                                                              | 16   | -0.4868 | -1.6012 | 0.0382    | 0.1926    | 0.714      |
| Day 10 | Microglia   | REACTOME_TRIF_MEDIATED_TLR3_SIGNALING                                             | 34   | -0.3744 | -1.5714 | 0.0182    | 0.1944    | 0.771      |
| Day 10 | Microglia   | KEGG_WNT_SIGNALING_PATHWAY                                                        | 17   | -0.4775 | -1.5818 | 0.0331    | 0.1989    | 0.76       |
| Day 10 | Macrophage  | REACTOME_CHEMOKINE_RECEPTORS_BIND_CHEMOKINES                                      | 24   | 0.6273  | 2.0938  | 0.0000    | 0.0069    | 0.013      |
| Day 10 | Macrophage  | REACTOME_G_ALPHA_I_SIGNALLING_EVENTS                                              | 21   | 0.6182  | 2.0076  | 0.0000    | 0.0070    | 0.037      |
| Day 10 | Macrophage  | REACTOME_PEPTIDE_LIGAND_BINDING_RECEPTORS                                         | 28   | 0.5907  | 2.0333  | 0.0000    | 0.0073    | 0.026      |
| Day 10 | Macrophage  | REACTOME_GPCR_LIGAND_BINDING                                                      | 32   | 0.5532  | 1.9484  | 0.0000    | 0.0104    | 0.073      |
| Day 10 | Macrophage  | REACTOME_CLASS_A1_RHODOPSIN_LIKE_RECEPTORS                                        | 30   | 0.5443  | 1.9058  | 0.0061    | 0.0138    | 0.119      |
| Day 10 | Macrophage  | REACTOME_GPCR_DOWNSTREAM_SIGNALING                                                | 29   | 0.5067  | 1.7706  | 0.0047    | 0.0461    | 0.379      |
| Day 10 | Macrophage  | KEGG_CHEMOKINE_SIGNALING_PATHWAY                                                  | 50   | 0.4486  | 1.7390  | 0.0058    | 0.0513    | 0.474      |
| Day 10 | Macrophage  | KEGG_CELL_ADHESION_MOLECULES_CAMS                                                 | 29   | 0.4913  | 1.7120  | 0.0144    | 0.0519    | 0.581      |
| Day 10 | Macrophage  | REACTOME_IMMUNOREGULATORY_INTERACTIONS_BETWEEN_A_LYMPHOID_AND_A_NON_LYMPHOID_CELL | 21   | 0.5372  | 1.7222  | 0.0081    | 0.0530    | 0.542      |
| Day 10 | Macrophage  | REACTOME_INTEGRIN_CELL_SURFACE_INTERACTIONS                                       | 19   | 0.5194  | 1.6326  | 0.0118    | 0.0739    | 0.781      |
| Day 10 | Macrophage  | REACTOME_SIGNALING_BY_GPCR                                                        | 43   | 0.4374  | 1.6416  | 0.0130    | 0.0755    | 0.762      |
| Day 10 | Macrophage  | NABA_MATRISOME                                                                    | 53   | 0.4150  | 1.6433  | 0.0044    | 0.0825    | 0.761      |
| Day 10 | Macrophage  | NABA_MATRISOME_ASSOCIATED                                                         | 48   | 0.3977  | 1.5354  | 0.0301    | 0.1303    | 0.955      |
| Day 10 | Macrophage  | REACTOME_CELL_SURFACE_INTERACTIONS_AT_THE_VASCULAR_WALL                           | 21   | 0.4528  | 1.4597  | 0.0769    | 0.1955    | 0.993      |

## \* Preclinical Checklist

*Preclinical Checklist: Prevention of bias is important for experimental cardiovascular research. **This short checklist must be completed, and the answers should be clearly presented in the manuscript.** The checklist will be used by reviewers and editors and it will be published. See ["Reporting Standard for Preclinical Studies of Stroke Therapy"](#) and ["Good Laboratory Practice: Preventing Introduction of Bias at the Bench"](#) for more information.*

This study involves animal models:

Yes

### Experimental groups and study timeline

The experimental group(s) have been clearly defined in the article, including number of animals in each experimental arm of the study: Yes

An account of the control group is provided, and number of animals in the control group has been reported. If no controls were used, the rationale has been stated: Yes

An overall study timeline is provided: No

### Inclusion and exclusion criteria

A priori inclusion and exclusion criteria for tested animals were defined and have been reported in the article: Yes

### Randomization

Animals were randomly assigned to the experimental groups. If the work being submitted does not contain multiple experimental groups, or if random assignment was not used, adequate explanations have been provided: Yes

Type and methods of randomization have been described: N/A

Methods used for allocation concealment have been reported: N/A

### Blinding

Blinding procedures have been described with regard to masking of group/treatment assignment from the experimenter. The rationale for nonblinding of the experimenter has been provided, if such was not feasible: N/A

Blinding procedures have been described with regard to masking of group assignment during outcome assessment: N/A

### Sample size and power calculations

Formal sample size and power calculations were conducted based on a priori determined outcome(s) and treatment effect, and the data have been reported. A formal size assessment was not conducted and a rationale has been provided: Yes

### Data reporting and statistical methods

Number of animals in each group: randomized, tested, lost to follow-up, or died have been reported. If the experimentation involves repeated measurements, the number of animals assessed at each time point is provided, for all experimental groups: Yes

Baseline data on assessed outcome(s) for all experimental groups have been reported: N/A

Details on important adverse events and death of animals during the course of experimentation have been provided, for all experimental arms: N/A

Statistical methods used have been reported: Yes

Numeric data on outcomes have been provided in text, or in a tabular format with the main article or as supplementary tables, in addition to the figures: Yes

### Experimental details, ethics, and funding statements

Details on experimentation including stroke model, formulation and dosage of therapeutic agent, site and route of administration, use of anesthesia and analgesia, temperature control during experimentation, and postprocedural monitoring have been described: Yes

Different sex animals have been used. If not, the reason/justification is provided: Yes

Statements on approval by ethics boards and ethical conduct of studies have been provided: Yes

Statements on funding and conflicts of interests have been provided: Yes

---

Date completed: 11/10/2020 11:28:27

User pid: 49131
